# Supplementary material for: Expanding donor options: haploidentical transplant recipients are also highly likely to have a 7/8-matched unrelated donor
Source: PubMed Central journal article supplement — Blood Adv. 2023 Dec 23;8(3):758–65. doi: 10.1182/bloodadvances.2023011814 (PMC10847856; doi:10.1182/bloodadvances.2023011814), 2023-12-23
Supplement: BLOODA_ADV-2023-011814-mmc1.pdf [file BLOODA_ADV-2023-011814-mmc1.pdf]

**Supplemental Figure 1a.**

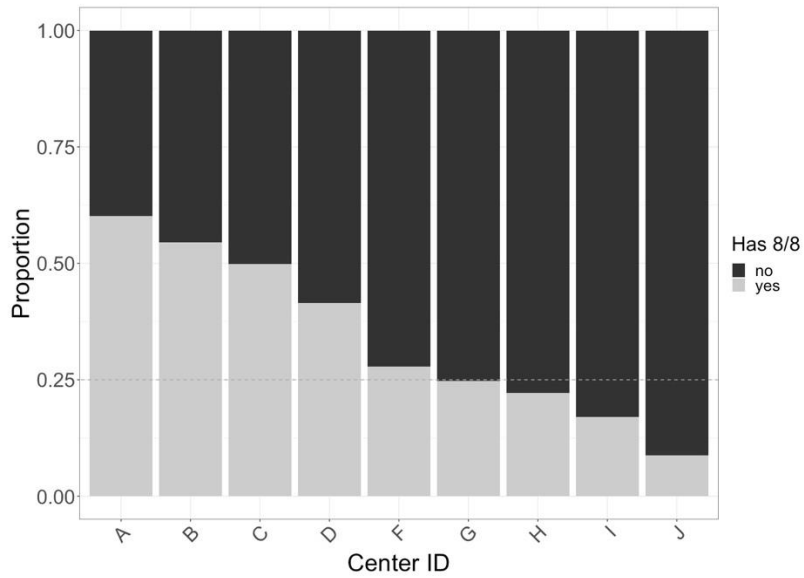

**Supplemental Figure 1b.**

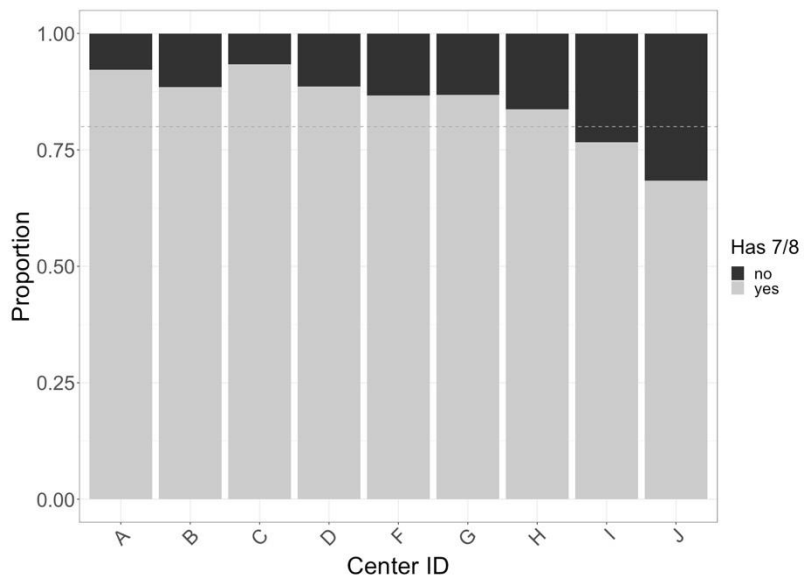

**SUPPLEMENTAL FIGURE LEGENDS**

**Supplemental Figure 1a:** Percent of 8/8 match existence for Adult HRD HCT patients treated at the highest volume HRD centers highlighting potential center preference/prioritization of HRD donors.

**Supplemental Figure 1b:** Percent of 7/8 match existence for Adult HRD HCT patients treated at the highest volume HRD centers highlighting potential center preference/prioritization of HRD donors.

## SUPPLEMENTAL MATERIAL

**Supplemental Table 1:** Characteristics of adult patients receiving haploidentical transplant between 2013-20 at a U.S. transplant center, reported to the CIBMTR and with sufficient HLA typing for evaluation (N=9696).

| <b>Characteristic</b>                 |             |
|---------------------------------------|-------------|
| Number of patients                    | 8212        |
| No. of centers                        | 172         |
| <b>Patient-Related</b>                |             |
| Patient age                           |             |
| Median (range)                        | 55 (18-87)  |
| Age Group (by decade) - no. (%)       |             |
| 18-19 Years Old                       | 175 (2.1)   |
| 20-29 Years Old                       | 1077 (13.1) |
| 30-39 Years Old                       | 877 (10.7)  |
| 40-49 Years Old                       | 1114 (13.6) |
| 50-59 Years Old                       | 1845 (22.5) |
| 60-69 Years Old                       | 2424 (29.5) |
| 70-79 Years Old                       | 695 (8.5)   |
| 80+ Years Old                         | 5 (0.1)     |
| Broad Race - no. (%)                  |             |
| African American                      | 1507 (18.4) |
| Asian and Pacific Islander            | 446 (5.4)   |
| Non-hispanic White                    | 4725 (57.5) |
| Hispanic                              | 1220 (14.9) |
| Multiple Race                         | 100 (1.2)   |
| Native American                       | 23 (0.3)    |
| Unknown                               | 191 (2.3)   |
| Sex - no. (%)                         |             |
| Male                                  | 4884 (59.5) |
| Female                                | 3328 (40.5) |
| <b>Donor-Related</b>                  |             |
| Donor age, years                      |             |
| Median (range)                        | 35 (0-77)   |
| Donor Age Group (by decade) - no. (%) |             |
| 0-9 Years Old                         | 15 (0.2)    |
| 10-19 Years Old                       | 631 (7.7)   |
| 20-29 Years Old                       | 2135 (26.0) |
| 30-39 Years Old                       | 2320 (28.3) |
| 40-49 Years Old                       | 1667 (20.3) |
| 50-59 Years Old                       | 966 (11.8)  |
| 60-69 Years Old                       | 415 (5.1)   |
| 70+ Years Old                         | 31 (0.4)    |
| Missing                               | 32 (0.4)    |

|                      |             |
|----------------------|-------------|
| Donor Sex: - no. (%) |             |
| Male                 | 4980 (60.6) |
| Female               | 3231 (39.3) |
| Missing              | 1 (0)       |

---

**Disease-Related**

|                                         |             |
|-----------------------------------------|-------------|
| Primary disease - no. (%)               |             |
| Autoimmune disorder                     | 4 (0.0)     |
| Acute lymphoid leukemia                 | 1261 (15.4) |
| Acute myeloid leukemia                  | 3305 (40.2) |
| Chronic myeloid leukemia                | 272 (3.3)   |
| Hodgkin's disease                       | 244 (3.0)   |
| Histiocytic disorders                   | 17 (0.2)    |
| Hemoglobinopathies                      | 137 (1.7)   |
| Inherited immune disorders              | 14 (0.2)    |
| Inherited disorders of metabolism       | 5 (0.1)     |
| Inherited bone marrow failure syndromes | 7 (0.1)     |
| Myelodysplastic syndromes               | 1207 (14.7) |
| Myeloproliferative neoplasms            | 280 (3.4)   |
| Non-Hodgkin's lymphoma                  | 816 (9.9)   |
| Other disease                           | 3 (0.0)     |
| Other acute leukemia                    | 92 (1.1)    |
| Other leukemia                          | 156 (1.9)   |
| Plasma cell disorders                   | 159 (1.9)   |
| Paroxysmal nocturnal hemoglobinuria     | 8 (0.1)     |
| Severe Aplastic Anemia                  | 207 (2.5)   |
| Solid tumor                             | 18 (0.2)    |

---

**Transplant-Related**

|                            |             |
|----------------------------|-------------|
| GVHD prophylaxis - no. (%) |             |
| PtCy                       | 7547 (91.9) |
| Other                      | 477 (5.8)   |
| Unknown                    | 188 (2.3)   |
| Transplant year - no. (%)  |             |
| 2013                       | 247 (3.0)   |
| 2014                       | 546 (6.6)   |
| 2015                       | 818 (10.0)  |
| 2016                       | 986 (12.0)  |
| 2017                       | 1209 (14.7) |
| 2018                       | 1374 (16.7) |
| 2019                       | 1495 (18.2) |
| 2020                       | 1537 (18.7) |

**Supplemental Table 2:** Search Prognosis distribution in the Adult HRD HCT cohort by race/ethnic group.

| <b>Population</b>                  | <b>SP Good N (%)</b> | <b>SP Fair N (%)</b> | <b>SP Poor N (%)</b> |
|------------------------------------|----------------------|----------------------|----------------------|
| African American (n=1507)          | 68 (4.51%)           | 1053 (69.87%)        | 386 (25.61%)         |
| Asian and Pacific Islander (n=446) | 50 (11.21%)          | 224 (50.22%)         | 172 (38.57%)         |
| Non-Hispanic White (n=4725)        | 1291 (27.32%)        | 1977 (41.84%)        | 1457 (30.84%)        |
| Hispanic (n=1220)                  | 106 (8.69%)          | 808 (66.23%)         | 306 (25.08%)         |
| Multiple Race (n=100)              | 5 (5.00%)            | 61 (61.00%)          | 34 (34.00%)          |
| Native American (n=23)             | 5 (21.74%)           | 12 (52.17%)          | 6 (26.09%)           |
| Unknown (n=191)                    | 14 (7.33%)           | 99 (51.83%)          | 78 (40.84%)          |

**Supplemental Table 3a.** Percentage of Adult HRD patients who have at least 1 8/8 or 7/8 on the registry considering donors of all ages and  $\leq 35$  years old by race/ethnic group.

| <b>Population</b>                  | <b><math>\geq 1</math> 8/8 N (%)</b> | <b><math>\geq 1</math> Young 8/8 N (%)</b> | <b><math>\geq 1</math> 7/8 N (%)</b> | <b><math>\geq 1</math> Young 7/8 N (%)</b> |
|------------------------------------|--------------------------------------|--------------------------------------------|--------------------------------------|--------------------------------------------|
| African American (n=1507)          | 225 (14.9%)                          | 94 (6.2%)                                  | 1051 (69.7%)                         | 730 (48.4%)                                |
| Asian and Pacific Islander (n=446) | 94 (21.1%)                           | 41 (9.2%)                                  | 347 (77.8%)                          | 254 (57%)                                  |
| Non-Hispanic White (n=4725)        | 2188 (46.3%)                         | 1575 (33.3%)                               | 4371 (92.5%)                         | 4026 (85.2%)                               |
| Hispanic (n=1220)                  | 293 (24%)                            | 169 (13.9%)                                | 979 (80.2%)                          | 789 (64.7%)                                |
| Multiple Race (n=100)              | 16 (16%)                             | 7 (7%)                                     | 72 (72%)                             | 53 (53%)                                   |
| Native American (n=23)             | 8 (34.8%)                            | 5 (21.7%)                                  | 22 (95.7%)                           | 18 (78.3%)                                 |
| Unknown (n=191)                    | 43 (22.5%)                           | 29 (15.2%)                                 | 140 (73.3%)                          | 115 (60.2%)                                |

**Supplemental Table 3b.** Percentage of Adult HRD patients who have at least 5 8/8 or 7/8 unrelated donor on the registry considering donors of all ages and  $\leq 35$  years old by race/ethnic group.

| <b>Population</b>                  | <b><math>\geq 5</math> 8/8 N (%)</b> | <b><math>\geq 5</math> Young 8/8 N (%)</b> | <b><math>\geq 5</math> 7/8 N (%)</b> | <b><math>\geq 5</math> Young 7/8 N (%)</b> |
|------------------------------------|--------------------------------------|--------------------------------------------|--------------------------------------|--------------------------------------------|
| African American (n=1507)          | 38 (2.5%)                            | 13 (0.9%)                                  | 647 (42.9%)                          | 258 (17.1%)                                |
| Asian and Pacific Islander (n=446) | 24 (5.4%)                            | 7 (1.6%)                                   | 218 (48.9%)                          | 103 (23.1%)                                |
| Non-Hispanic White (n=4725)        | 1326 (28.1%)                         | 904 (19.1%)                                | 3918 (82.9%)                         | 3194 (67.6%)                               |
| Hispanic (n=1220)                  | 86 (7%)                              | 33 (2.7%)                                  | 719 (58.9%)                          | 407 (33.4%)                                |
| Multiple Race (n=100)              | 1 (1%)                               | 1 (1%)                                     | 40 (40%)                             | 18 (18%)                                   |
| Native American (n=23)             | 4 (17.4%)                            | 1 (4.3%)                                   | 17 (73.9%)                           | 12 (52.2%)                                 |
| Unknown (n=191)                    | 15 (7.9%)                            | 9 (4.7%)                                   | 112 (58.6%)                          | 69 (36.1%)                                 |

**Supplemental Table 4.** Percentage of Adult patients receiving HCT from an older HRD (>35 years old) who have at least 1 young ( $\leq 35$  years old) 8/8 or 7/8 unrelated donor on the registry by race/ethnic group.

| <b>Population</b>                  | <b><math>\geq 1</math> Young<br/>8/8 N (%)</b> | <b><math>\geq 5</math> Young 8/8<br/>N (%)</b> | <b><math>\geq 1</math> Young<br/>7/8 N (%)</b> | <b><math>\geq 5</math> Young<br/>7/8 N (%)</b> |
|------------------------------------|------------------------------------------------|------------------------------------------------|------------------------------------------------|------------------------------------------------|
| African American (n=769)           | 56 (7.3%)                                      | 7 (0.9%)                                       | 386 (50.2%)                                    | 154 (20%)                                      |
| Asian and Pacific Islander (n=185) | 18 (9.7%)                                      | 5 (2.7%)                                       | 110 (59.5%)                                    | 45 (24.3%)                                     |
| Non-Hispanic White (n=2544)        | 839 (33%)                                      | 505 (19.9%)                                    | 2152 (84.6%)                                   | 1687 (66.3%)                                   |
| Hispanic (n=574)                   | 83 (14.5%)                                     | 16 (2.8%)                                      | 372 (64.8%)                                    | 193 (33.6%)                                    |
| Multiple Race (n=40)               | 1 (2.5%)                                       | 0 (0%)                                         | 24 (60%)                                       | 10 (25%)                                       |
| Native American (n=11)             | 1 (9.1%)                                       | 0 (0%)                                         | 9 (81.8%)                                      | 6 (54.5%)                                      |
| Unknown (n=92)                     | 11 (12%)                                       | 2 (2.2%)                                       | 58 (63%)                                       | 34 (37%)                                       |

**Supplemental Table 5.** Percent of Adult patients with a probable search ID at Be The Match and Search Prognosis Score Distributions at the highest volume HRD centers.

| <b>Center ID</b> | <b>% Ran Search</b> | <b>% SP Good</b> | <b>% SP Fair</b> | <b>% SP Poor</b> |
|------------------|---------------------|------------------|------------------|------------------|
| A                | 46.7                | 39.6             | 37.3             | 23.1             |
| B                | 84.9                | 29               | 53.4             | 17.6             |
| C                | 95.7                | 33.7             | 39.6             | 26.7             |
| D                | 96.6                | 25.6             | 39.8             | 34.7             |
| F                | 71.7                | 11.5             | 60.7             | 27.8             |
| G                | 94.8                | 10.3             | 62.6             | 27               |
| H                | 95                  | 6.8              | 61.5             | 31.7             |
| I                | 64.3                | 3.5              | 56.1             | 40.4             |
| J                | 97                  | 1.7              | 57.6             | 40.7             |



**Supplemental Table 6.** Search Prognosis distribution in the HRD HCT cohort with MatchSource Search IDs by race/ethnic group.

| <b>Population</b>                  | <b>SP Good N (%)</b> | <b>SP Fair N (%)</b> | <b>SP Poor N (%)</b> |
|------------------------------------|----------------------|----------------------|----------------------|
| African American (n=1543)          | 67 (4.3%)            | 1087 (70.4%)         | 389 (25.3%)          |
| Asian and Pacific Islander (n=450) | 45 (10%)             | 231 (51.3%)          | 174 (38.7%)          |
| Non-Hispanic White (n=4192)        | 970 (23.1%)          | 1849 (44.1%)         | 1373 (32.8%)         |
| Hispanic (n=1397)                  | 121 (8.7%)           | 911 (65.2%)          | 365 (26.1%)          |
| Multiple Race (n=156)              | 9 (5.8%)             | 93 (59.6%)           | 54 (34.6%)           |
| Native American (n=36)             | 4 (11.1%)            | 19 (52.8%)           | 13 (36.1%)           |
| Unknown (n=221)                    | 17 (7.7%)            | 110 (49.8%)          | 94 (42.5%)           |

**Supplemental Table 7.** Count of HRD HCT cohort with 6-5/8 Donors.

| <b>Category</b>              | <b>HRD HCT Patients N (%)</b> |
|------------------------------|-------------------------------|
| ≥ 1 Young (18-35) 6/8 Donors | 9323 (96.2%)                  |
| ≥ 1 6/8 Donors               | 9565 (98.6%)                  |
| ≥ 5 Young (18-35) 6/8 Donors | 8543 (88.1%)                  |
| ≥ 5 6/8 Donors               | 9279 (95.7%)                  |
| ≥ 1 Young (18-35) 5/8 Donors | 9677 (99.8%)                  |
| ≥ 1 5/8 Donors               | 9690 (99.9%)                  |
| ≥ 5 Young (18-35) 5/8 Donors | 9596 (99%)                    |
| ≥ 5 5/8 Donors               | 9673 (99.8%)                  |

**Supplemental Table 8.** Count of HRD HCT cohort with Class restricted mismatches for 7/8 or 6/8.

| <b>Category</b>                 | <b>HRD HCT Patients N (%)</b> |
|---------------------------------|-------------------------------|
| $\geq 1$ 7/8 Class I MM Donors  | 7349 (75.8%)                  |
| $\geq 1$ 7/8 Class II MM Donors | 6913 (71.3%)                  |
| $\geq 5$ 7/8 Class I MM Donors  | 5413 (55.8%)                  |
| $\geq 5$ 7/8 Class II MM Donors | 4988 (51.4%)                  |
| $\geq 1$ 6/8 Class I MM Donors  | 9137 (94.2%)                  |
| $\geq 1$ 6/8 Class II MM Donors | 7538 (77.7%)                  |
| $\geq 5$ 6/8 Class I MM Donors  | 8410 (86.7%)                  |
| $\geq 5$ 6/8 Class II MM Donors | 5999 (61.9%)                  |

**Supplemental Table 9.** Count of HRD HCT cohort with CMV +/- donors at 8-6/8

| Category            | HRD HCT Patients N (%) |
|---------------------|------------------------|
| ≥ 1 8/8 CMV- Donors | 2074 (21.4%)           |
| ≥ 1 8/8 CMV+ Donors | 1994 (20.6%)           |
| ≥ 5 8/8 CMV- Donors | 1091 (11.3%)           |
| ≥ 5 8/8 CMV+ Donors | 975 (10.1%)            |
| ≥ 1 7/8 CMV- Donors | 6413 (66.1%)           |
| ≥ 1 7/8 CMV+ Donors | 6431 (66.3%)           |
| ≥ 5 7/8 CMV- Donors | 4132 (42.6%)           |
| ≥ 5 7/8 CMV+ Donors | 4022 (41.5%)           |
| ≥ 1 6/8 CMV- Donors | 9095 (93.8%)           |
| ≥ 1 6/8 CMV+ Donors | 9157 (94.4%)           |
| ≥ 5 6/8 CMV- Donors | 7950 (82%)             |
| ≥ 5 6/8 CMV+ Donors | 8045 (83%)             |
